# Supplementary material
Source: MDPI journal article supplement (https://www.mdpi.com/1420-3049/29/1/17)

---

The following ALERTS were generated. Each ALERT has the format  
**test-name\_ALERT\_alert-type\_alert-level.**  
Click on the hyperlinks for more details of the test.

---

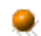

#### Alert level B

RINTA01\_ALERT\_3\_B The value of Rint is greater than 0.18  
Rint given 0.199

**Author Response: : Crystals diffracted weakly. Attempts were made to grow larger and better diffracting crystals. Data was collected for three different crystals, with this one giving better results. Despite that the model is sound and agrees with other spectroscopic results.**

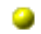

#### Alert level C

|                   |                                                 |        |       |
|-------------------|-------------------------------------------------|--------|-------|
| PLAT088_ALERT_3_C | Poor Data / Parameter Ratio .....               | 9.03   | Note  |
| PLAT242_ALERT_2_C | Low 'MainMol' Ueq as Compared to Neighbors of   | Ru1    | Check |
| PLAT260_ALERT_2_C | Large Average Ueq of Residue Including P1       | 0.119  | Check |
| PLAT260_ALERT_2_C | Large Average Ueq of Residue Including P1'      | 0.108  | Check |
| PLAT342_ALERT_3_C | Low Bond Precision on C-C Bonds .....           | 0.0105 | Ang.  |
| PLAT906_ALERT_3_C | Large K Value in the Analysis of Variance ..... | 17.053 | Check |
| PLAT906_ALERT_3_C | Large K Value in the Analysis of Variance ..... | 2.755  | Check |

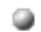

#### Alert level G

|                   |                                                  |        |        |
|-------------------|--------------------------------------------------|--------|--------|
| PLAT003_ALERT_2_G | Number of Uiso or Uij Restrained non-H Atoms ... | 24     | Report |
| PLAT020_ALERT_3_G | The Value of Rint is Greater Than 0.12 .....     | 0.199  | Report |
| PLAT083_ALERT_2_G | SHELXL Second Parameter in WGHT Unusually Large  | 5.06   | Why ?  |
| PLAT178_ALERT_4_G | The CIF-Embedded .res File Contains SIMU Records | 4      | Report |
| PLAT187_ALERT_4_G | The CIF-Embedded .res File Contains RIGU Records | 2      | Report |
| PLAT188_ALERT_3_G | A Non-default SIMU Restraint Value has been used | 0.0200 | Report |
| PLAT188_ALERT_3_G | A Non-default SIMU Restraint Value has been used | 0.0200 | Report |
| PLAT301_ALERT_3_G | Main Residue Disorder .....(Resd 1 )             | 33%    | Note   |
| PLAT302_ALERT_4_G | Anion/Solvent/Minor-Residue Disorder (Resd 2 )   | 100%   | Note   |
| PLAT302_ALERT_4_G | Anion/Solvent/Minor-Residue Disorder (Resd 3 )   | 100%   | Note   |
| PLAT304_ALERT_4_G | Non-Integer Number of Atoms in ..... (Resd 2 )   | 4.92   | Check  |
| PLAT304_ALERT_4_G | Non-Integer Number of Atoms in ..... (Resd 3 )   | 2.08   | Check  |
| PLAT811_ALERT_5_G | No ADDSYM Analysis: Too Many Excluded Atoms .... | !      | Info   |
| PLAT860_ALERT_3_G | Number of Least-Squares Restraints .....         | 258    | Note   |
| PLAT883_ALERT_1_G | No Info/Value for _atom_sites_solution_primary . | Please | Do !   |
| PLAT899_ALERT_4_G | SHELXL2018 is Deprecated and Succeeded by SHELXL | 2019/3 | Note   |
| PLAT909_ALERT_3_G | Percentage of I>2sig(I) Data at Theta(Max) Still | 69%    | Note   |
| PLAT910_ALERT_3_G | Missing # of FCF Reflection(s) Below Theta(Min). | 3      | Note   |
| PLAT933_ALERT_2_G | Number of HKL-OMIT Records in Embedded .res File | 3      | Note   |
| PLAT961_ALERT_5_G | Dataset Contains no Negative Intensities .....   | Please | Check  |
| PLAT967_ALERT_5_G | Note: Two-Theta Cutoff Value in Embedded .res .. | 50.0   | Degree |
| PLAT978_ALERT_2_G | Number C-C Bonds with Positive Residual Density. | 1      | Info   |

---

0 **ALERT level A** = Most likely a serious problem - resolve or explain  
1 **ALERT level B** = A potentially serious problem, consider carefully

7 **ALERT level C** = Check. Ensure it is not caused by an omission or oversight  
22 **ALERT level G** = General information/check it is not something unexpected

1 ALERT type 1 CIF construction/syntax error, inconsistent or missing data  
7 ALERT type 2 Indicator that the structure model may be wrong or deficient  
12 ALERT type 3 Indicator that the structure quality may be low  
7 ALERT type 4 Improvement, methodology, query or suggestion  
3 ALERT type 5 Informative message, check

---

It is advisable to attempt to resolve as many as possible of the alerts in all categories. Often the minor alerts point to easily fixed oversights, errors and omissions in your CIF or refinement strategy, so attention to these fine details can be worthwhile. In order to resolve some of the more serious problems it may be necessary to carry out additional measurements or structure refinements. However, the purpose of your study may justify the reported deviations and the more serious of these should normally be commented upon in the discussion or experimental section of a paper or in the "special\_details" fields of the CIF. checkCIF was carefully designed to identify outliers and unusual parameters, but every test has its limitations and alerts that are not important in a particular case may appear. Conversely, the absence of alerts does not guarantee there are no aspects of the results needing attention. It is up to the individual to critically assess their own results and, if necessary, seek expert advice.

### **Publication of your CIF in IUCr journals**

A basic structural check has been run on your CIF. These basic checks will be run on all CIFs submitted for publication in IUCr journals (*Acta Crystallographica*, *Journal of Applied Crystallography*, *Journal of Synchrotron Radiation*); however, if you intend to submit to *Acta Crystallographica Section C* or *E* or *IUCrData*, you should make sure that full publication checks are run on the final version of your CIF prior to submission.

### **Publication of your CIF in other journals**

Please refer to the *Notes for Authors* of the relevant journal for any special instructions relating to CIF submission.

---

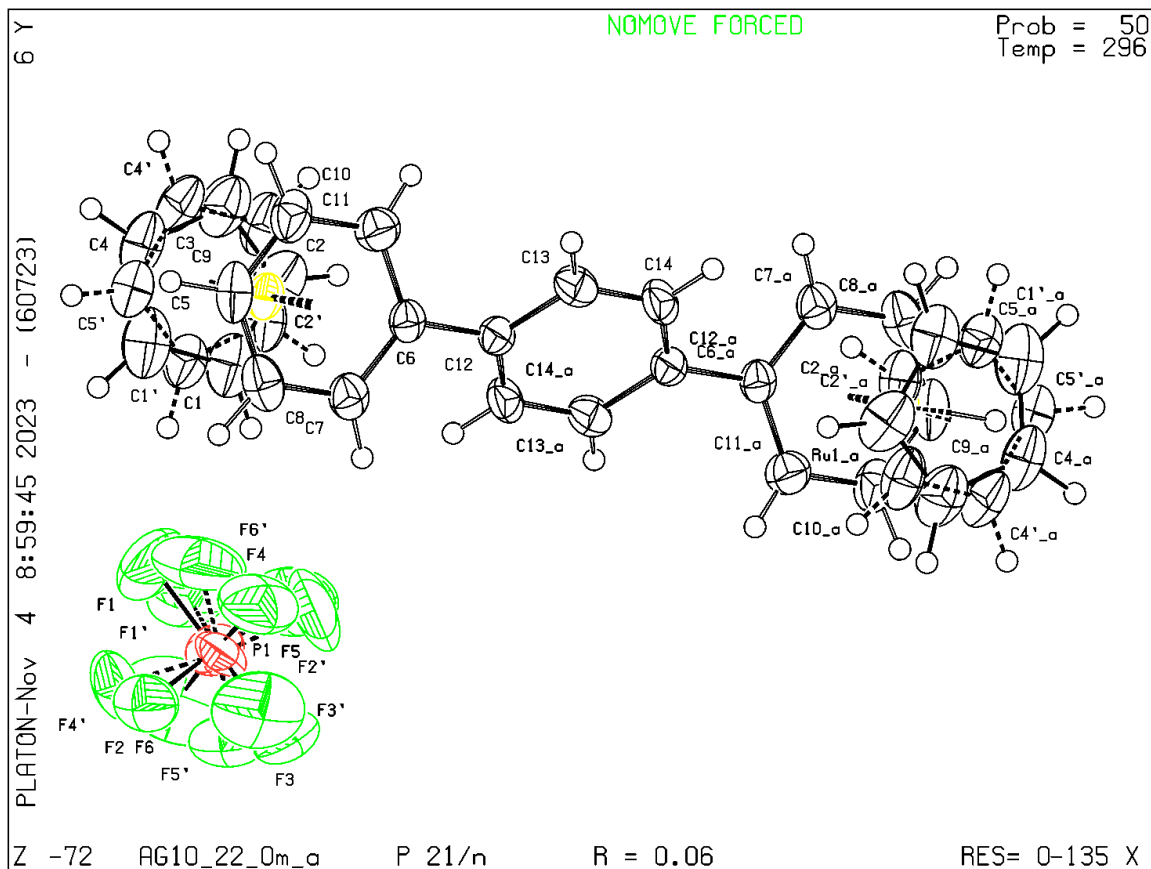

Supplement: s1 [file s1]
