# Supplementary material for: Synthesis and Characterization of Ruthenium-Paraphenylene-Cyclopentadienyl Full-Sandwich Complexes: Cytotoxic Activity against A549 Lung Cancer Cell Line and DNA Binding Properties
Source: MDPI journal article supplement (doi:10.3390/molecules29010017), 2023-12-19
Supplement: s1 [file s1]

## checkCIF/PLATON report

Structure factors have been supplied for datablock(s) AG12\_22\_0m

THIS REPORT IS FOR GUIDANCE ONLY. IF USED AS PART OF A REVIEW PROCEDURE FOR PUBLICATION, IT SHOULD NOT REPLACE THE EXPERTISE OF AN EXPERIENCED CRYSTALLOGRAPHIC REFEREE.

No syntax errors found.      CIF dictionary      Interpreting this report

### Datablock: AG12\_22\_0m

---

Bond precision:      C-C = 0.0093 Å      Wavelength=0.71073

Cell:                      a=10.5346(15)                      b=12.1661(16)                      c=14.845(2)  
                              alpha=104.711(8)                      beta=104.567(7)                      gamma=101.525(8)  
Temperature:      296 K

|                        | Calculated       | Reported           |
|------------------------|------------------|--------------------|
| Volume                 | 1709.0(4)        | 1708.9(4)          |
| Space group            | P -1             | P -1               |
| Hall group             | -P 1             | -P 1               |
| Moiety formula         | C17 H15 Ru, F6 P | ?                  |
| Sum formula            | C17 H15 F6 P Ru  | C34 H30 F12 P2 Ru2 |
| Mr                     | 465.33           | 930.66             |
| Dx, g cm <sup>-3</sup> | 1.809            | 1.809              |
| Z                      | 4                | 2                  |
| Mu (mm <sup>-1</sup> ) | 1.068            | 1.068              |
| F000                   | 920.0            | 920.0              |
| F000'                  | 915.92           |                    |
| h, k, lmax             | 12, 14, 17       | 12, 14, 17         |
| Nref                   | 6034             | 6029               |
| Tmin, Tmax             | 0.880, 0.938     | 0.556, 0.747       |
| Tmin'                  | 0.726            |                    |

Correction method= # Reported T Limits: Tmin=0.556 Tmax=0.747  
AbsCorr = MULTI-SCAN

Data completeness= 0.999      Theta(max)= 24.998

|                               |                   |
|-------------------------------|-------------------|
| R(reflections)= 0.0403( 4012) | wR2(reflections)= |
| S = 1.004                     | 0.1031( 6029)     |
| Npar= 525                     |                   |

---

The following ALERTS were generated. Each ALERT has the format

**test-name\_ALERT\_alert-type\_alert-level.**

Click on the hyperlinks for more details of the test.

---

### Alert level C

RINTA01\_ALERT\_3\_C The value of Rint is greater than 0.12

Rint given 0.169

|                   |                                                  |                             |         |        |
|-------------------|--------------------------------------------------|-----------------------------|---------|--------|
| PLAT213_ALERT_2_C | Atom C2B'                                        | has ADP max/min Ratio ..... | 3.3     | oblate |
| PLAT234_ALERT_4_C | Large Hirshfeld Difference C1A                   | --C2A                       | 0.18    | Ang.   |
| PLAT234_ALERT_4_C | Large Hirshfeld Difference Ru2                   | --C2B'                      | 0.18    | Ang.   |
| PLAT241_ALERT_2_C | High 'MainMol' Ueq as Compared to Neighbors of   |                             | C14B    | Check  |
| PLAT242_ALERT_2_C | Low 'MainMol' Ueq as Compared to Neighbors of    |                             | Ru1     | Check  |
| PLAT242_ALERT_2_C | Low 'MainMol' Ueq as Compared to Neighbors of    |                             | Ru2     | Check  |
| PLAT260_ALERT_2_C | Large Average Ueq of Residue Including           | P1                          | 0.126   | Check  |
| PLAT260_ALERT_2_C | Large Average Ueq of Residue Including           | P2                          | 0.108   | Check  |
| PLAT342_ALERT_3_C | Low Bond Precision on C-C Bonds .....            |                             | 0.00931 | Ang.   |
| PLAT906_ALERT_3_C | Large K Value in the Analysis of Variance .....  |                             | 6.914   | Check  |
| PLAT910_ALERT_3_C | Missing # of FCF Reflection(s) Below Theta(Min). |                             | 5       | Note   |

---

### Alert level G

|                   |                                                  |        |              |
|-------------------|--------------------------------------------------|--------|--------------|
| PLAT003_ALERT_2_G | Number of Uiso or Uij Restrained non-H Atoms ... | 20     | Report       |
| PLAT020_ALERT_3_G | The Value of Rint is Greater Than 0.12 .....     | 0.169  | Report       |
| PLAT045_ALERT_1_G | Calculated and Reported Z Differ by a Factor ... | 2      | Check        |
| PLAT178_ALERT_4_G | The CIF-Embedded .res File Contains SIMU Records | 2      | Report       |
| PLAT188_ALERT_3_G | A Non-default SIMU Restraint Value has been used | 0.0300 | Report       |
| PLAT188_ALERT_3_G | A Non-default SIMU Restraint Value has been used | 0.0300 | Report       |
| PLAT244_ALERT_4_G | Low 'Solvent' Ueq as Compared to Neighbors of    | P1     | Check        |
| PLAT244_ALERT_4_G | Low 'Solvent' Ueq as Compared to Neighbors of    | P2     | Check        |
| PLAT301_ALERT_3_G | Main Residue Disorder .....(Resd 1 )             | 28%    | Note         |
| PLAT301_ALERT_3_G | Main Residue Disorder .....(Resd 2 )             | 28%    | Note         |
| PLAT720_ALERT_4_G | Number of Unusual/Non-Standard Labels .....      | 20     | Note         |
| PLAT860_ALERT_3_G | Number of Least-Squares Restraints .....         | 312    | Note         |
| PLAT883_ALERT_1_G | No Info/Value for _atom_sites_solution_primary . |        | Please Do !  |
| PLAT899_ALERT_4_G | SHELXL2018 is Deprecated and Succeeded by SHELXL | 2019/3 | Note         |
| PLAT909_ALERT_3_G | Percentage of I>2sig(I) Data at Theta(Max) Still | 43%    | Note         |
| PLAT961_ALERT_5_G | Dataset Contains no Negative Intensities .....   |        | Please Check |
| PLAT967_ALERT_5_G | Note: Two-Theta Cutoff Value in Embedded .res .. | 50.0   | Degree       |
| PLAT978_ALERT_2_G | Number C-C Bonds with Positive Residual Density. | 0      | Info         |

---

0 **ALERT level A** = Most likely a serious problem - resolve or explain

0 **ALERT level B** = A potentially serious problem, consider carefully

12 **ALERT level C** = Check. Ensure it is not caused by an omission or oversight

18 **ALERT level G** = General information/check it is not something unexpected

2 ALERT type 1 CIF construction/syntax error, inconsistent or missing data

8 ALERT type 2 Indicator that the structure model may be wrong or deficient

11 ALERT type 3 Indicator that the structure quality may be low

7 ALERT type 4 Improvement, methodology, query or suggestion

2 ALERT type 5 Informative message, check

---

It is advisable to attempt to resolve as many as possible of the alerts in all categories. Often the minor alerts point to easily fixed oversights, errors and omissions in your CIF or refinement strategy, so attention to these fine details can be worthwhile. In order to resolve some of the more serious problems it may be necessary to carry out additional measurements or structure refinements. However, the purpose of your study may justify the reported deviations and the more serious of these should normally be commented upon in the discussion or experimental section of a paper or in the "special\_details" fields of the CIF. checkCIF was carefully designed to identify outliers and unusual parameters, but every test has its limitations and alerts that are not important in a particular case may appear. Conversely, the absence of alerts does not guarantee there are no aspects of the results needing attention. It is up to the individual to critically assess their own results and, if necessary, seek expert advice.

### **Publication of your CIF in IUCr journals**

A basic structural check has been run on your CIF. These basic checks will be run on all CIFs submitted for publication in IUCr journals (*Acta Crystallographica*, *Journal of Applied Crystallography*, *Journal of Synchrotron Radiation*); however, if you intend to submit to *Acta Crystallographica Section C* or *E* or *IUCrData*, you should make sure that full publication checks are run on the final version of your CIF prior to submission.

### **Publication of your CIF in other journals**

Please refer to the *Notes for Authors* of the relevant journal for any special instructions relating to CIF submission.
