# Supplementary material for: Synthesis and Characterization of Ruthenium-Paraphenylene-Cyclopentadienyl Full-Sandwich Complexes: Cytotoxic Activity against A549 Lung Cancer Cell Line and DNA Binding Properties
Source: Molecules. 2023 Dec 19;29(1):17. doi: 10.3390/molecules29010017 (PMC10780011; doi:10.3390/molecules29010017)
Supplement: Supplementary file 1 [file molecules-29-00017-s001.zip]

Archive with 4 entries (4 files):
- checkcif_1.pdf
- checkcif_3.pdf
- checkcif_4.pdf
- SUPPLEMENTARY VAG..pdf
